1 **Rates of Positive M-CHAT-R Screenings by Pandemic Birth and Prenatal SARS-CoV-2**  
2 **Exposure**

3 \***Morgan R. Firestein**, Ph.D.<sup>1</sup>, \***Angela Gigliotti Manassis**, M.S.<sup>2</sup>, **Jen Warmingham**, Ph.D.<sup>3</sup>,  
4 **Yunzhe Hu**, B.A.<sup>1</sup>, **Morgan A. Finkel**, M.D., M.S.<sup>3,4</sup>, **Margaret Kyle**, B.A.<sup>3</sup>, **Maha Hussain**,  
5 M.S.<sup>3</sup>, **Imaal Ahmed**, B.A.<sup>3</sup>, **Andréane Lavallée**, Ph.D.<sup>3</sup>, **Ana Solis**<sup>3</sup>, **Vitoria Chaves**, M.S.<sup>3</sup>,  
6 **Cynthia Rodriguez**, B.A.<sup>3</sup>, **Sylvie Goldman**, Ph.D.<sup>4,5</sup>, **Rebecca A. Muhle**, M.D., Ph.D.<sup>1,4,5</sup>,  
7 **Seonjoo Lee**, Ph.D.<sup>1,5,6</sup>, **Judy Austin**, Ph.D.<sup>7</sup>, **Wendy G. Silver**, M.D., M.A.<sup>4,8</sup>, **Kally C.**  
8 **O'Reilly**, Ph.D.<sup>1,5</sup>, **Jennifer M. Bain**, M.D., Ph.D.<sup>4,8</sup>, **Anna A. Penn**, M.D., Ph.D.<sup>3,4</sup>, **Jeremy**  
9 **Veenstra-VanderWeele**, M.D.,<sup>1,3,4,5</sup>, **Melissa S. Stockwell**, M.D., M.P.H.<sup>3,4,7</sup>, **William P. Fifer**,  
10 Ph.D.<sup>1,3</sup>, **Rachel Marsh**, Ph.D.<sup>1,8</sup>, **Catherine Monk**, Ph.D.<sup>1,5,9</sup>, **Lauren C. Shuffrey**, Ph.D.<sup>10</sup>,  
11 **Dani Dumitriu**, M.D., Ph.D.<sup>1,3,4</sup>

12 \*Dr. Firestein and Ms. Gigliotti Manassis contributed equally to this article

13 <sup>1</sup>Department of Psychiatry, Columbia University Irving Medical Center, New York, NY 10032

14 <sup>2</sup>Teachers College, Columbia University, New York, NY 10027

15 <sup>3</sup>Department of Pediatrics, Columbia University Irving Medical Center, New York, NY 10032

16 <sup>4</sup>New York-Presbyterian Morgan Stanley Children's Hospital, New York, NY 10032

17 <sup>5</sup>New York State Psychiatric Institute, New York, NY 10032

18 <sup>6</sup>Department of Biostatistics, Mailman School of Public Health, Columbia University Irving  
19 Medical Center, New York, NY 10032

20 <sup>7</sup>Heilbrunn Department of Population and Family Health, Columbia University Irving Medical  
21 Center, New York, NY 10032

22 <sup>8</sup>Department of Neurology, Division of Child Neurology, Columbia University Irving Medical  
23 Center, New York, NY 10032

24 <sup>9</sup>Department of Obstetrics and Gynecology, Columbia University Irving Medical Center New  
25 York, NY 10032

26 <sup>10</sup>Department of Psychiatry, New York University Grossman School of Medicine, New York,  
27 NY 10016

28

29 **Corresponding Author:**

30 Dani Dumitriu, M.D., Ph.D.

31 New York State Psychiatric Institute

32 Columbia University Irving Medical Center

33 1051 Riverside Drive, Suite 4807

34 New York, NY 10032

35 dani.dumitriu@columbia.edu

36

37

38

39

40 **Abstract**

41 Maternal stress and viral illness during pregnancy are associated with neurodevelopmental  
42 conditions in offspring. Children born during the COVID-19 pandemic, including those exposed  
43 prenatally to maternal SARS-CoV-2 infections, are reaching the developmental age for the  
44 assessment of risk for neurodevelopmental conditions. We examined associations between birth  
45 during the COVID-19 pandemic, prenatal exposure to maternal SARS-CoV-2 infection, and  
46 rates of positive screenings on the Modified Checklist for Autism in Toddlers-Revised (M-  
47 CHAT-R). Data were drawn from the COVID-19 Mother Baby Outcomes (COMBO) Initiative.  
48 Participants completed the M-CHAT-R as part of routine clinical care (COMBO-EHR cohort) or  
49 for research purposes (COMBO-RSCH cohort). Maternal SARS-CoV-2 status during pregnancy  
50 was determined through electronic health records. The COMBO-EHR cohort includes n=1664  
51 children (n=442 historical cohort, n=1222 pandemic cohort; n=997 SARS-CoV-2 unexposed  
52 prenatally, n=130 SARS-CoV-2 exposed prenatally) who were born at affiliated hospitals  
53 between 2018-2023 and who had a valid M-CHAT-R score in their health record. The COMBO-  
54 RSCH cohort consists of n=359 children (n=268 SARS-CoV-2 unexposed prenatally, n=91  
55 SARS-CoV-2 exposed prenatally) born at the same hospitals who enrolled into a prospective  
56 cohort study that included administration of the M-CHAT-R at 18-months. Birth during the  
57 pandemic was not associated with greater likelihood of a positive M-CHAT-R screen in the  
58 COMBO-EHR cohort. Maternal SARS-CoV-2 was associated with lower likelihood of a positive  
59 M-CHAT-R screening in adjusted models in the COMBO-EHR cohort (OR=0.40, 95% CI=0.22  
60 - 0.68,  $p=0.001$ ), while analyses in the COMBO-RSCH cohort yielded similar but non-  
61 significant results (OR=0.67, 95% CI=0.31-1.37,  $p=0.29$ ). These results suggest that children  
62 born during the first 18 months of the COVID-19 pandemic and those exposed prenatally to a  
63 maternal SARS-CoV-2 infection are not at greater risk for screening positive on the M-CHAT-R.

64

65

66

67

## 68 **Introduction**

69           Since the onset of the COVID-19 pandemic, we have gained substantial knowledge about  
70 the SARS-CoV-2 virus and resulting COVID-19 pathophysiology. However, longitudinal  
71 research is needed to determine long-term consequences of early exposure to both the virus and  
72 the pandemic environment, especially those affecting the youngest generations.<sup>1-3</sup> Most reports  
73 have provided reassuring results suggesting no association between prenatal exposure to  
74 maternal SARS-CoV-2 infection and child neurodevelopment.<sup>4-8</sup> One research group found that  
75 a higher proportion of prenatally exposed male infants received ICD-10 codes for speech  
76 disorders at age 12 months, but not at 18 months. This finding, coupled with a lower-than-  
77 expected rate of SARS-CoV-2 infections, suggests a high rate of misclassification and false  
78 negatives which may limit the interpretability of these results.<sup>9,10</sup> Further, studies of infants born  
79 during previous pandemics have shown that neurodevelopmental needs are frequently  
80 unobserved until years later,<sup>11</sup> necessitating additional follow-up.

81           Beyond prenatal exposure to SARS-CoV-2, the COVID-19 generation—the generation  
82 born during this pandemic—experienced an unusual environment during infancy and early  
83 childhood secondary to societal changes and restrictions. Several reports from diverse  
84 populations revealed neurodevelopmental differences between pandemic-born compared to pre-  
85 pandemic-born children.<sup>4,6,7,12</sup>

86           The COVID-19 pandemic therefore presents a two-pronged mechanism through which  
87 the COVID-19 generation may be at greater risk for neurodevelopmental conditions such as  
88 autism spectrum disorders.<sup>6,13</sup> Maternal prenatal psychological distress has been implicated in  
89 increased neurodevelopmental risk through a fetal programming framework.<sup>14,15</sup> Separately,  
90 maternal immune activation (MIA) is among the potential mechanisms through which prenatal

91 exposure to SARS-CoV-2 has been hypothesized to impact offspring neurodevelopment.  
92 Previous outbreaks of human coronaviruses (such as SARS and Middle East Respiratory  
93 Syndrome) indicate that severe infection during pregnancy may negatively affect both maternal  
94 health and infant well-being, possibly through MIA.<sup>13,16</sup> Based on these premises, we  
95 hypothesized that infants exposed to a maternal SARS-CoV-2 in utero would be at increased risk  
96 of screening positive on the M-CHAT-R.

97         Given the benefits of early intervention,<sup>17,18</sup> special attention should be directed towards  
98 evaluating the relationship between fetal exposure to maternal SARS-CoV-2 infection, the  
99 COVID-19 pandemic environment, and child neurodevelopment. Children who were *in utero*  
100 during peak periods of the pandemic are reaching the age at which early indicators of risk for  
101 autism may emerge. We compared scores on the parent-report Modified Checklist for Autism in  
102 Toddlers-Revised (M-CHAT-R) screener between children born before and during the pandemic  
103 and those with and without prenatal SARS-CoV-2 exposure. Data were collected as part of the  
104 COVID-19 Mother Baby Outcomes (COMBO) Initiative and include clinical M-CHAT-R scores  
105 recorded in electronic health records (EHR) and M-CHAT-R scores obtained for research  
106 purposes from children born at a large university-based medical center in New York City  
107 between January 2018 and September 2021.

108

## 109 **Methods**

### 110 *Study Design and Participants*

111         Data were drawn from the COVID-19 Mother Baby Outcomes (COMBO) Initiative,  
112 which includes children born at Columbia University Irving Medical Center (CUIMC)-affiliated  
113 NewYork-Presbyterian (NYP) Morgan Stanley Children's Hospital and NYP Allen Pavilion

114 Hospital in New York City between January 2018 and September 2021. COMBO includes an  
115 electronic health record (EHR) arm (COMBO-EHR cohort) with a waiver of consent and a  
116 prospective research arm (COMBO-RSCH cohort) with on-going enrollment and consent of  
117 mother-infant dyads (eFigure 1). Across the two cohorts, demographic and clinical variables,  
118 including maternal SARS-CoV-2 status during pregnancy, were acquired through a combination  
119 of automated abstraction and manual review of the participants' EHRs. As part of routine clinical  
120 care, all CUIMC/NYP-affiliated pediatric clinics began universally administering the M-CHAT-  
121 R between 16-30 months of age in February 2020, and scores are recorded in the EHR.  
122 Separately, mothers enrolled in COMBO-RSCH are asked to complete the M-CHAT-R at the 18-  
123 month study follow-up for research purposes. All study procedures have been reviewed and  
124 approved by the CUIMC Institutional Review Board. This study followed the Strengthening the  
125 Reporting of Observational Studies in Epidemiology (STROBE) reporting guidelines.

126

### 127 ***COMBO-EHR Cohort***

128 We identified n=1747 children born in the NYP hospital system during the study period  
129 with clinical M-CHAT-R scores in the EHRs. For children with more than one M-CHAT-R  
130 score, we used the most recent score obtained within the valid age range. We excluded n=80  
131 children because their only M-CHAT-R score was obtained outside the range of 16-30 months.  
132 We excluded an additional n=3 children who received a total M-CHAT-R score of 17 that  
133 resulted from all items being marked as "yes," suggesting invalid parental report. In total, we  
134 included n=1664 children in COMBO-EHR analyses.

135

136 ***COMBO-RSCH Cohort***

137           At the time of this analysis, the COMBO Initiative had enrolled n=907 mother-infant  
138 dyads who had been admitted to the labor & delivery unit and/or well-baby/NICU units of the  
139 CUIMC-NYP hospital system in New York City during the study period. Overall, n=421  
140 enrolled mothers completed the M-CHAT-R for research purposes as part of a REDCap survey  
141 administered at the 18-month study time point. Sixty-two children were excluded from COMBO-  
142 RSCH analyses because they had M-CHAT-R scores obtained for both clinical and research  
143 purposes. These cases were only included in COMBO-EHR dataset to prioritize the analysis of  
144 clinical screening data. In total, we included n=359 children in COMBO-RSCH analyses.

145

146 ***Timing of Birth Relative to the COVID-19 Pandemic***

147           The COMBO-EHR cohort includes n=442 infants born prior to the COVID-19 pandemic  
148 (historical cohort) with dates of birth between January 2018–February 2020 and n=1222 infants  
149 born during the COVID-19 pandemic (pandemic cohort) with dates of birth between March  
150 2020–September 2021. In contrast, all infants in the COMBO-RSCH cohort were born during  
151 the COVID-19 pandemic. Therefore, the historical versus pandemic birth comparison could only  
152 be conducted on the COMBO-EHR cohort. Of note, all infants in the COMBO-EHR cohort,  
153 including those born prior to the pandemic (historical cohort), were assessed *during* the  
154 pandemic as universal M-CHAT-R screening at pediatric clinics coincided with the onset of the  
155 pandemic for unrelated reasons. Thus, every child in the COMBO-EHR cohort had *postnatal*  
156 exposure to the pandemic environment.

157

158 ***Determination of Prenatal Maternal SARS-CoV-2 Infection***

159 Maternal SARS-CoV-2 status during pregnancy was determined through EHR  
160 abstraction and review. Detailed descriptions of our methods for determining maternal SARS-  
161 CoV-2 status during pregnancy have been reported previously<sup>4,5</sup> and are outlined in eFigure 2.  
162 Briefly, on March 22, 2020, CUIMC began universal testing of all delivering patients for SARS-  
163 CoV-2 through nasopharyngeal polymerase chain reaction (PCR) and on July 20, 2020, universal  
164 serology testing for SARS-CoV-2 antibodies was implemented. Infants born before November 1,  
165 2020, were considered exposed during pregnancy if their mother had a positive PCR and/or  
166 serological test during pregnancy or at delivery. If their mother had a negative PCR test and no  
167 available serological test result, they were classified as unexposed. For infants born after  
168 November 1, 2020, mothers could have had a pre-pregnancy infection that would result in a  
169 positive serology test during pregnancy. Therefore, these infants were considered exposed during  
170 pregnancy if their mother had a positive PCR and/or antigen test during pregnancy. If their  
171 mothers did not have a recorded positive PCR or antigen test but had a positive serological test  
172 and COVID-19 symptoms during the pregnancy, they were also considered exposed. Infants  
173 were classified as unexposed if their mother had a positive serology test during pregnancy or at  
174 the time of delivery, but had no symptoms during the pregnancy, had negative serological  
175 testing, or had no serology test results and no symptoms during the pregnancy determined  
176 through manual chart review. We have previously estimated that this approach has a 0.67%  
177 false-negative rate (eMethods 1).

178

179 ***Modified Checklist for Autism in Toddlers (M-CHAT-R)***

180 The M-CHAT-R was developed to assess risk for autism based on parent report of their  
181 child's development between 16-30 months of age and consists of twenty 'yes'/'no' items that  
182 focus on a child's milestones as well as early autism symptoms that present between the normed  
183 age span.<sup>19</sup> Total scores are calculated and categorized into ranges of "low-risk" (0-2); "medium-  
184 risk" (3-7); "high-risk" (8-20). To improve power, we collapsed across the medium-risk and  
185 high-risk ranges to define a medium/high-risk range, which we defined as screening positive.  
186 The M-CHAT-R has been validated as having high sensitivity and specificity as a measure for  
187 likelihood of autism, with diagnoses confirmed through a variety of measures such as the Autism  
188 Diagnostic Observation Schedule and is widely adopted by clinicians.<sup>20,21</sup> The M-CHAT-R was  
189 administered in either English or Spanish depending on the caregiver's preference.

190

### 191 *Statistical analysis*

192 Statistical analyses were conducted in R version 4.3.1 (R Foundation for Statistical  
193 Computing).<sup>22</sup> M-CHAT-R scores were obtained through EHR review for the COMBO-EHR  
194 cohort and using a forced-choice online survey for the COMBO-RSCH cohort, resulting in no  
195 missingness of data. Since participants in both cohorts were born in the same hospital system, all  
196 demographic variables and other covariates were obtained via the EHRs. For each of our three  
197 primary analyses, we performed separate unadjusted Chi-squared tests and multivariable logistic  
198 regression models. Using data from the COMBO-EHR cohort, we performed an unadjusted Chi-  
199 squared test and an adjusted logistic regression model to assess the association between birth  
200 during the COVID-19 pandemic and a positive screening on the M-CHAT-R. For the subset of  
201 COMBO-EHR children born during the COVID-19 pandemic and the COMBO-RSCH cohort,  
202 we performed an unadjusted Chi-squared test and a multivariable logistic regression model to



203 determine the association between prenatal maternal SARS-CoV-2 status and positive screening  
204 on the M-CHAT-R. All multivariable models included as covariates the child's age at  
205 assessment, sex assigned at birth, maternal race and ethnicity, mode of delivery, gestational age  
206 at delivery, maternal age at delivery, and insurance type as a proxy for socioeconomic status  
207 (Medicaid versus commercial). To examine potential demographic differences between groups,  
208 comparisons were performed using Chi-squared tests for binomial variables and Wilcoxon rank  
209 sum tests for continuous variables. For the primary analyses, we report Chi-squared results for  
210 univariate models and odds ratios (ORs) with 95% confidence intervals (CIs) for multivariable  
211 models. For all analyses, we conducted separate subgroup analyses of full-term and preterm  
212 children, as well as subgroup analyses of male and female children. For analyses of SARS-CoV-  
213 2 exposure within both COMBO-EHR and COMBO-RSCH cohorts, we conducted an additional  
214 sensitivity analysis omitting cases without serology testing in the EHR. Finally, we compared the  
215 proportion of children screening positive on the M-CHAT-R and the age at assessment across the  
216 COMBO-RSCH and COMBO-EHR cohorts using independent samples t-tests and Chi-squared  
217 tests. All sensitivity analyses used multivariable models. Significance was set at  $p < 0.05$ .

218

## 219 **Results**

### 220 *Cohort Characteristics*

221 The COMBO-EHR cohort included  $n = 1664$  children,  $n = 442$  born before March 2020  
222 (historical cohort) and  $n = 1222$  born during the COVID-19 pandemic. In the pandemic-born  
223 group, 95 dyads lacked maternal PCR and serology data or had unknown infection timing,  
224 resulting in  $n = 997$  and  $n = 130$  SARS-CoV-2 unexposed and exposed children, respectively.  
225 Characteristics of the mother-child dyads included in the COMBO-EHR cohort are summarized

226 in Table 1. The mean maternal age at delivery was  $30 \pm 6.24$  years. The pandemic cohort  
227 differed significantly from the historical cohort in maternal age at delivery ( $p=0.002$ ), self-  
228 reported race ( $\chi^2=597.91$ ,  $df=6$ ,  $p<0.001$ ), ethnicity ( $\chi^2=596.41$ ,  $df=3$ ,  $p<0.001$ ), infant  
229 gestational age ( $p=0.02$ ), child's age at M-CHAT-R assessment ( $p<0.01$ ), and infant sex at birth  
230 ( $\chi^2=6.97$ ,  $df=1$ ,  $p=0.008$ ) (Table 1). Mothers in the SARS-CoV-2 exposed cohort differed  
231 significantly from the unexposed cohort in their self-reported race ( $\chi^2=8.63$ ,  $df=5$ ,  $p=0.12$ ) and  
232 ethnicity ( $\chi^2=12.31$ ,  $df=2$ ,  $p=0.002$ ) (Table 1). Group differences were accounted for in all fully  
233 adjusted models.

234 The COMBO-RSCH cohort ( $n=359$ ) demographic characteristics are summarized in  
235 Table 2. The mean maternal age at delivery was  $32 \pm 5.08$  years. Mother-child dyads with ( $n=91$ )  
236 and without ( $n=268$ ) SARS-CoV-2 exposure during pregnancy were compared on the same  
237 sociodemographic characteristics described above. Mothers with a history of SARS-CoV-2  
238 infection during pregnancy differed significantly from unexposed mothers in their self-reported  
239 ethnicity ( $\chi^2=9.16$ ,  $df=3$ ,  $p=0.03$ ). Additionally, exposed children were significantly younger at  
240 the time of the M-CHAT-R assessment ( $p=0.03$ ). Group differences were accounted for in all  
241 fully adjusted models.

242 Additional analyses comparing the COMBO-EHR and COMBO-RSCH cohorts are  
243 described in eMethods 2.

244

#### 245 ***Birth During the Pandemic and M-CHAT-R Positive Screening: COMBO-EHR Cohort***

246 There was no difference in the proportion of children screening positive on the M-  
247 CHAT-R between the historical and pandemic cohorts ( $\chi^2=0.03$ ,  $df=1$ ,  $p=0.87$ ). Specifically,

248 22% (n=100) of the children in the historical cohort and 23% (n=283) of the children in the  
249 pandemic cohort screened positive (Figure 1A). The lack of an association between birth during  
250 the pandemic and M-CHAT-R positivity was maintained in a fully adjusted model accounting  
251 for maternal age, child age at assessment, child sex, race, ethnicity, gestational age, and  
252 insurance (OR=0.75, 95% CI=0.52–1.08, p=0.12) (Table 3). Similar non-significant findings  
253 were observed in adjusted subgroup analyses of preterm (n=204) and full-term subsamples  
254 (n=1460) (eTable 1) and in adjusted subgroup analyses of male (n=880) and female (n=784)  
255 children (eTable 2).

256

257 ***Prenatal Maternal SARS-CoV-2 Infection and M-CHAT-R Positive Screenings: COMBO-***  
258 ***EHR Cohort***

259 There was a significant association between SARS-CoV-2 exposure during pregnancy  
260 and less likelihood of M-CHAT-R positive screenings, which was in the opposite direction as  
261 hypothesized ( $\chi^2=8.28$ ,  $df=1$ ,  $p=0.004$ ). Specifically, 23% (n=239) of unexposed children and  
262 12% (n=16) of exposed children screened positive on the M-CHAT-R (Figure 1B). This  
263 association remained significant in a fully adjusted model (OR=0.40, 95% CI=0.22–0.68,  
264  $p=0.004$ ) (Table 4) and persisted in sensitivity analyses excluding cases with elevated potential  
265 for misclassification of SARS-CoV-2 exposure due to missing serology testing (n=427,  
266 OR=0.43, 95% CI=0.22–0.81,  $p=0.01$ ) (eTable 3). Among full-term children, a lower proportion  
267 of children with SARS-CoV-2 exposure screened positive on the M-CHAT-R (n=982, adjusted  
268 OR=0.45, 95% CI=0.24–0.79,  $p=0.01$ ), whereas this association did not reach statistical  
269 significance among preterm children (n=145, OR=0.16, 95% CI=0.01–0.84,  $p=0.07$ ) (eTable 4).

270 Within both female and male subsamples, a lower proportion of children with SARS-CoV-2  
271 exposure screened positive on the M-CHAT-R (females:  $n=555$ , adjusted OR=0.30 95%  
272 CI=0.10–0.71,  $p=0.01$ ; males:  $n=572$ , OR=0.48, 95% CI=0.23–0.93,  $p=0.04$ ) (eTable 5).

273

### 274 *Prenatal Maternal SARS-CoV-2 Infection and M-CHAT-R Positive Screenings: COMBO-* 275 *RSCH Cohort*

276 Overall, fewer SARS-CoV-2 exposed children screened positive (13%,  $n=12$ ) compared  
277 to 17% ( $n=47$ ) of unexposed children in the COMBO-RSCH cohort (Figure 1C). However, this  
278 association was not statistically significant ( $\chi^2=0.65$ ,  $df=1$ ,  $p=0.42$ ). The lack of a significant  
279 association persisted in a fully adjusted model with the same covariates as those used in the  
280 COMBO-EHR analysis (OR=0.67, 95% CI=0.31–1.37,  $p=0.25$ ) (Table 4). Similar non-  
281 significant associations were observed in adjusted subgroup analyses of preterm ( $n=37$ ) and full-  
282 term subsamples ( $n=322$ ) (eTable 6) and in subgroup analyses of male ( $n=199$ ) and female  
283 ( $n=160$ ) children (eTable 7).

284

## 285 **Discussion**

286 Considering the conflicting evidence on the relationship between COVID-19 and infant  
287 neurodevelopment, continued long-term monitoring of the COVID-19 generation is important  
288 for public health and educational policy. We evaluated the neurodevelopmental risk of children  
289 born before and during the COVID-19 pandemic and those with and without prenatal SARS-  
290 CoV-2 exposure using the M-CHAT-R in a demographically diverse sample in New York City.  
291 We found that children born before versus during the pandemic did not have significantly

292 different M-CHAT-R positivity rates. Contrary to our hypothesis, we found that maternal SARS-  
293 CoV-2 infection during pregnancy was not associated with increased risk for a positive autism  
294 screen based on the M-CHAT-R.

295 Overall, our sample had higher M-CHAT-R positivity rates compared to other samples  
296 (22-23% compared to 9% in a general population).<sup>23</sup> Participants in our analysis primarily reside  
297 in an urban city, where the prevalence of autism diagnoses is higher, potentially due to increased  
298 access to healthcare services or environmental exposures unique to urban areas.<sup>24</sup> Our cohort has  
299 a uniquely high percentage of Hispanic participants, a population found to have higher positivity  
300 rates on the M-CHAT-R.<sup>25-27</sup> Further, validity on the Spanish version of the M-CHAT-R was  
301 conducted in Spain, which is culturally different from our study sample.<sup>28</sup>

302 In our sample, maternal SARS-CoV-2 exposure during pregnancy was not associated  
303 with increased risk for screening positive on the M-CHAT-R. Research suggests that SARS-  
304 CoV-2 may cause MIA, with moderate but temporary changes in cytokine levels in pregnant  
305 women<sup>29</sup> that could be associated with infant neurodevelopmental risk.<sup>10</sup> Our findings align with  
306 other reports of no or limited associations between prenatal SARS-CoV-2 exposure and infant  
307 neurodevelopment.<sup>4,5,7,12</sup> Many of these studies, however, including ours, primarily include  
308 participants with mild illness. Additional exploration of the relationship between severity of  
309 infection and neurodevelopment is needed.

310 Of note, the percentage of children who were exposed to SARS-CoV-2 in utero had  
311 positivity rates that were closer to the expected rate in a general population; whereas the  
312 unexposed children had a higher-than-expected M-CHAT-R positivity rate.<sup>30</sup> It is possible that  
313 unmeasured differences between the exposed and unexposed cohorts in conjunction with the  
314 subjective nature of the M-CHAT-R could contribute to the unexpected direction of this

315 association. Data suggest that maternal dispositional variables relate to reporting of their child's  
316 behavior.<sup>31</sup> Mothers who experienced greater stress and vigilance towards the prevention of  
317 SARS-CoV-2 may be less likely to become infected and more likely to monitor and report  
318 concerning behaviors through the M-CHAT-R.<sup>32,33</sup> Additionally, the unexpected positivity rates  
319 may be due to limitations of the M-CHAT-R as a research tool. We used only one M-CHAT-R  
320 score, without follow-up, for each participant. Finally, it is important to note that all children  
321 were assessed during the pandemic and had some amount of postnatal exposure to the pandemic  
322 environment. Therefore, our analyses are limited to *prenatal* associations and cannot evaluate  
323 associations between *postnatal* experiences and M-CHAT-R positivity.

324 Our findings suggest that neither SARS-CoV-2 infection nor birth during the pandemic is  
325 associated with increased risk for autism. For many, the social and economic impact of the  
326 pandemic will persist in the years to come and may continue to impact the developmental  
327 trajectories of the COVID-19 generation.<sup>34</sup> There may also be intergenerational consequences  
328 that could worsen existing inequalities.<sup>35</sup> Furthermore, data suggest that the impact of prenatal  
329 exposures may not manifest until higher cognitive functions begin to emerge and mature.<sup>36</sup> The  
330 COVID-19 pandemic has resulted in increased mental health needs amongst pregnant and  
331 postpartum individuals,<sup>37</sup> and higher levels of the stress hormone cortisol during pregnancy is  
332 associated with lower offspring educational attainment.<sup>38</sup> At the same time, the pandemic  
333 catalyzed a number of changes in the education system.<sup>39</sup> Continued monitoring of this  
334 generation is important to develop targeted and appropriate policies in education and welfare.

335

336

337

338 **Acknowledgements:** The authors are grateful for the institutional support provided by the  
339 Maternal-Child Research Oversight (MaCRO) Committee and the Departments of Pediatrics,  
340 Psychiatry, and Obstetrics and Gynecology at Columbia University Irving Medical Center,  
341 which made possible the collection of time-sensitive information at the height of the COVID-19  
342 pandemic prior to the availability of external funding opportunities. The authors wish to thank  
343 the entire COVID-19 Mother Baby Outcomes (COMBO) Initiative Team for their collaborative  
344 and persevering contributions throughout the COVID-19 pandemic and the Columbia University  
345 Irving Medical Center Clinical Data Warehouse. Finally, the authors extend particular gratitude  
346 toward the families enrolled in COMBO, whose participation continues to inform our  
347 understanding of this unprecedented global event. Dr. Dumitriu has pending reimbursement for  
348 consulting for Medela Inc. No funding agency played any role in any of the following: design  
349 and conduct of the study; collection, management, analysis, and interpretation of the data;  
350 preparation, review, or approval of the manuscript; and decision to submit the manuscript for  
351 publication. Dr. Dumitriu had full access to all the data in the study and takes responsibility for  
352 the integrity of the data and the accuracy of the data analysis. Drs. Firestein, Warmingham,  
353 Shuffrey, Dumitriu, and Ms. Manassis are responsible for the data analysis.

354

355

356

357

358

359

360 **References**

- 361 1. López-Díaz, Á., Ayesa-Arriola, R., Crespo-Facorro, B. & Ruiz-Veguilla, M. COVID-19  
362 Infection During Pregnancy and Risk of Neurodevelopmental Disorders in Offspring: Time  
363 for Collaborative Research. *Biol. Psychiatry* **89**, e29–e30 (2021).
- 364 2. Ahmed, W. N., Noushin, A. M., Shafjeer, A. & Ann, R. COVID-19 and Pregnancy: Time to  
365 Think beyond Medications. 11.
- 366 3. Martins-Filho, P. R., Tanajura, D. M., Santos, H. P. & Santos, V. S. COVID-19 during  
367 pregnancy: Potential risk for neurodevelopmental disorders in neonates? *Eur. J. Obstet.*  
368 *Gynecol. Reprod. Biol.* **250**, 255–256 (2020).
- 369 4. Shuffrey, L. C. *et al.* Association of Birth During the COVID-19 Pandemic With  
370 Neurodevelopmental Status at 6 Months in Infants With and Without In Utero Exposure to  
371 Maternal SARS-CoV-2 Infection. *JAMA Pediatr.* e215563 (2022)  
372 doi:10.1001/jamapediatrics.2021.5563.
- 373 5. Firestein, M. R. *et al.* Assessment of Neurodevelopment in Infants With and Without  
374 Exposure to Asymptomatic or Mild Maternal SARS-CoV-2 Infection During Pregnancy.  
375 *JAMA Netw. Open* **6**, e237396 (2023).
- 376 6. Brum, A. C. & Vain, N. E. Impact of perinatal COVID on fetal and neonatal brain and  
377 neurodevelopmental outcomes. *Semin. Fetal. Neonatal Med.* **28**, 101427 (2023).
- 378 7. Ayed, M. *et al.* Neurodevelopmental outcomes of infants born to mothers with SARS-CoV-2  
379 infections during pregnancy: a national prospective study in Kuwait. *BMC Pediatr.* **22**, 319  
380 (2022).
- 381 8. Pinheiro, G. S. M. A. *et al.* Effects of intrauterine exposure to SARS-CoV-2 on infants'  
382 development: a rapid review and meta-analysis. *Eur. J. Pediatr.* **182**, 2041–2055 (2023).



- 383 9. Edlow, A. G., Castro, V. M., Shook, L. L., Kaimal, A. J. & Perlis, R. H.  
384 Neurodevelopmental Outcomes at 1 Year in Infants of Mothers Who Tested Positive for  
385 SARS-CoV-2 During Pregnancy. *JAMA Netw. Open* **5**, e2215787 (2022).
- 386 10. Edlow, A. G. *et al.* Sex-Specific Neurodevelopmental Outcomes Among Offspring of  
387 Mothers With SARS-CoV-2 Infection During Pregnancy. *JAMA Netw. Open* **6**, e234415  
388 (2023).
- 389 11. Almond, D. Is the 1918 Influenza Pandemic Over? Long-Term Effects of In Utero  
390 Influenza Exposure in the Post-1940 U.S. Population. *J. Polit. Econ.* **114**, 672–712 (2006).
- 391 12. Hessami, K. *et al.* COVID-19 Pandemic and Infant Neurodevelopmental Impairment: A  
392 Systematic Review and Meta-analysis. *JAMA Netw. Open* **5**, e2238941 (2022).
- 393 13. San Martín-González, N. *et al.* Maternal respiratory viral infections during pregnancy and  
394 offspring's neurodevelopmental outcomes: A systematic review. *Neurosci. Biobehav. Rev.*  
395 **149**, 105178 (2023).
- 396 14. van den Bergh, B. R. H., Dahnke, R. & Mennes, M. Prenatal stress and the developing brain:  
397 Risks for neurodevelopmental disorders. *Dev. Psychopathol.* **30**, 743–762 (2018).
- 398 15. Manzari, N., Matvienko-Sikar, K., Baldoni, F., O'Keeffe, G. W. & Khashan, A. S. Prenatal  
399 maternal stress and risk of neurodevelopmental disorders in the offspring: a systematic  
400 review and meta-analysis. *Soc. Psychiatry Psychiatr. Epidemiol.* **54**, 1299–1309 (2019).
- 401 16. Diriba, K., Awulachew, E. & Getu, E. The effect of coronavirus infection (SARS-CoV-2,  
402 MERS-CoV, and SARS-CoV) during pregnancy and the possibility of vertical maternal–  
403 fetal transmission: a systematic review and meta-analysis. *Eur. J. Med. Res.* **25**, 39 (2020).
- 404 17. Fernell, E., Eriksson, M. A. & Gillberg, C. Early diagnosis of autism and impact on  
405 prognosis: a narrative review. *Clin. Epidemiol.* **5**, 33–43 (2013).

- 406 18. Granpeesheh, D., Dixon, D. R., Tarbox, J., Kaplan, A. M. & Wilke, A. E. The effects of age  
407 and treatment intensity on behavioral intervention outcomes for children with autism  
408 spectrum disorders. *Res. Autism Spectr. Disord.* **3**, 1014–1022 (2009).
- 409 19. Robins, D. L., Barton, M. & Fein, D. Modified Checklist for Autism in Toddlers, Revised  
410 with Follow-up. American Psychological Association <https://doi.org/10.1037/t67574-000>  
411 (2018).
- 412 20. Aishworiya, R., Ma, V. K., Stewart, S., Hagerman, R. & Feldman, H. M. Meta-analysis of  
413 the Modified Checklist for Autism in Toddlers, Revised/Follow-up for Screening. *Pediatrics*  
414 **151**, e2022059393 (2023).
- 415 21. Wieckowski, A. T., Williams, L. N., Rando, J., Lyall, K. & Robins, D. L. Sensitivity and  
416 Specificity of the Modified Checklist for Autism in Toddlers (Original and Revised): A  
417 Systematic Review and Meta-analysis. *JAMA Pediatr.* **177**, 373–383 (2023).
- 418 22. R Core Team. R: A language and environment for statistical computing. R Foundation for  
419 Statistical Computing (2021).
- 420 23. Chlebowski, C., Robins, D. L., Barton, M. L. & Fein, D. Large-Scale Use of the Modified  
421 Checklist for Autism in Low-Risk Toddlers. *Pediatrics* **131**, e1121–e1127 (2013).
- 422 24. Lauritsen, M. B. *et al.* Urbanicity and Autism Spectrum Disorders. *J. Autism Dev. Disord.*  
423 **44**, 394–404 (2014).
- 424 25. Kimple, K. S., Bartelt, E. A., Wysocki, K. L. & Steiner, M. J. Performance of the Modified  
425 Checklist for Autism in Toddlers in Spanish-Speaking Patients. *Clin. Pediatr. (Phila.)* **53**,  
426 632–638 (2014).

- 427 26. Rea, K. E., Armstrong-Brine, M., Ramirez, L. & Stancin, T. Ethnic Disparities in Autism  
428 Spectrum Disorder Screening and Referral: Implications for Pediatric Practice. *J. Dev.*  
429 *Behav. Pediatr. JDBP* **40**, 493–500 (2019).
- 430 27. Windham, G. C., Lyall, K., Anderson, M. & Kharrazi, M. Autism Spectrum Disorder Risk in  
431 Relation to Maternal Mid-Pregnancy Serum Hormone and Protein Markers from Prenatal  
432 Screening in California. *J. Autism Dev. Disord.* **46**, 478–488 (2016).
- 433 28. Magán-Maganto, M. *et al.* Spanish Cultural Validation of the Modified Checklist for Autism  
434 in Toddlers, Revised. *J. Autism Dev. Disord.* **50**, 2412–2423 (2020).
- 435 29. Jain, S., Allen, I. E., Song, D. & Piao, X. Cytokine responses to SARS-COV2 infection in  
436 mother-infant dyads: a systematic review and meta-analysis. *Front. Pediatr.* **11**, 1277697  
437 (2023).
- 438 30. Robins, D. L. *et al.* Validation of the Modified Checklist for Autism in Toddlers, Revised  
439 With Follow-up (M-CHAT-R/F). *Pediatrics* **133**, 37–45 (2014).
- 440 31. Durbin, C. E. & Wilson, S. Convergent validity of and bias in maternal reports of child  
441 emotion. *Psychol. Assess.* **24**, 647–660 (2012).
- 442 32. Crowell, J. A., Keluskar, J. & Gorecki, A. Parenting behavior and the development of  
443 children with autism spectrum disorder. *Compr. Psychiatry* **90**, 21–29 (2019).
- 444 33. Gray, P. H., Edwards, D. M., O’Callaghan, M. J. & Gibbons, K. Screening for autism  
445 spectrum disorder in very preterm infants during early childhood. *Early Hum. Dev.* **91**, 271–  
446 276 (2015).
- 447 34. Benner, A. D. & Mistry, R. S. Child Development During the COVID-19 Pandemic Through  
448 a Life Course Theory Lens. *Child Dev. Perspect.* **14**, 236–243 (2020).

- 449 35. Fitzgerald, E., Hor, K. & Drake, A. J. Maternal influences on fetal brain development: The  
450 role of nutrition, infection and stress, and the potential for intergenerational consequences.  
451 *Early Hum. Dev.* **150**, 105190 (2020).
- 452 36. Konijnenberg, C. Methodological Issues in Assessing the Impact of Prenatal Drug Exposure.  
453 *Subst. Abuse Res. Treat.* **9s2**, SART.S23544 (2015).
- 454 37. Firestein, M. R., Dumitriu, D., Marsh, R. & Monk, C. Maternal Mental Health and Infant  
455 Development During the COVID-19 Pandemic. *JAMA Psychiatry* **79**, 1040–1045 (2022).
- 456 38. Aizer, A., Stroud, L. & Buka, S. Maternal Stress and Child Outcomes: Evidence from  
457 Siblings. *J. Hum. Resour.* **51**, 523–555 (2016).
- 458 39. White, M. A. & McCallum, F. *Wellbeing and Resilience Education: COVID-19 and Its*  
459 *Impact on Education.* (Routledge, 2021).

460

461

462

463

464 **Figure Captions**

465

466 **Figure 1. Percent of Children Screening Positive on the M-CHAT-R in the COMBO-EHR and COMBO-RSCH Datasets.**  
467 **Dashed grey lines indicate previously reported rates of positivity in low-risk, US samples.**

468

**Table 1. Electronic Medical Record (COMBO-EHR) Cohort Characteristics**

| Variable<br>No. (%) or Median (Min, Max) | Overall<br>Sample<br>(N=1664) | Historical<br>Cohort<br>(N=442) | Pandemic<br>Cohort<br>(n=1222) | Historical Cohort vs.<br>Pandemic Cohort |                             | SARS-CoV-2<br>Unexposed<br>(N=997) | SARS-CoV-2<br>Exposed<br>(N=130) | SARS-CoV-2<br>Unexposed vs.<br>Exposed |                             |
|------------------------------------------|-------------------------------|---------------------------------|--------------------------------|------------------------------------------|-----------------------------|------------------------------------|----------------------------------|----------------------------------------|-----------------------------|
|                                          |                               |                                 |                                | <i>p</i> <sup>†</sup>                    | Test statistic <sup>†</sup> |                                    |                                  | <i>p</i> <sup>†</sup>                  | Test statistic <sup>†</sup> |
| <b>Maternal Characteristics</b>          |                               |                                 |                                |                                          |                             |                                    |                                  |                                        |                             |
| <b>Age at Delivery (years)</b>           | 30<br>(16, 56)                | 31.00<br>(16, 56)               | 30.00<br>(17, 55)              | 0.002                                    | 296990                      | 30.00<br>(17.00, 55.00)            | 28.00<br>(17.00, 43.00)          | 0.08                                   | 70947                       |
| <b>Insurance</b>                         |                               |                                 |                                | <.001                                    | 49.83                       |                                    |                                  | 0.52                                   | 0.42                        |
| Commercial                               | 419 (25.18%)                  | 167 (37.78%)                    | 252 (20.62%)                   |                                          |                             | 213 (21.36%)                       | 24 (18.46%)                      |                                        |                             |
| Medicaid                                 | 1245 (74.82%)                 | 275 (62.21%)                    | 970 (79.38%)                   |                                          |                             | 784 (78.64%)                       | 106 (81.54%)                     |                                        |                             |
| <b>Race</b>                              |                               |                                 |                                | <.001                                    | 597.91                      |                                    |                                  | 0.12                                   | 8.63                        |
| Black or African American                | 266 (16%)                     | 71 (16.06%)                     | 195 (15.96%)                   |                                          |                             | 166 (16.65%)                       | 18 (13.85%)                      |                                        |                             |
| Native American or Alaskan Native        | 8 (0.48%)                     | 2 (0.45%)                       | 6 (0.49%)                      |                                          |                             | 3 (0.30%)                          | 1 (0.77%)                        |                                        |                             |
| Asian or Asian American                  | 65 (3.9%)                     | 30 (6.79%)                      | 35 (2.86%)                     |                                          |                             | 33 (3.31%)                         | 2 (1.54%)                        |                                        |                             |
| White                                    | 400 (24.04%)                  | 156 (35.29%)                    | 244 (19.97%)                   |                                          |                             | 200 (20.06%)                       | 21 (16.15%)                      |                                        |                             |
| Other or Mixed Race                      | 608 (36.54%)                  | 30 (6.79%)                      | 578 (47.30%)                   |                                          |                             | 460 (46.14%)                       | 76 (58.46%)                      |                                        |                             |
| Declined                                 | 180 (10.82%)                  | 16 (3.62%)                      | 164 (13.42%)                   |                                          |                             | 135 (13.54%)                       | 12 (9.23%)                       |                                        |                             |
| Unknown                                  | 137 (8.23%)                   | 137 (31.00%)                    | 0 (0%)                         |                                          |                             | 0 (0.00%)                          | 0 (0.00%)                        |                                        |                             |
| <b>Ethnicity</b>                         |                               |                                 |                                | <.001                                    | 596.41                      |                                    |                                  | 0.002                                  | 12.31                       |
| Hispanic or Latino/a/x or Spanish        | 991 (59.56%)                  | 144 (32.58%)                    | 847 (69.31%)                   |                                          |                             | 669 (67.10%)                       | 105 (80.77%)                     |                                        |                             |
| Not Hispanic or Latino/a/x or Spanish    | 398 (23.92%)                  | 114 (25.79%)                    | 284 (23.24%)                   |                                          |                             | 247 (24.77%)                       | 23 (17.69%)                      |                                        |                             |
| Declined                                 | 95 (5.71%)                    | 4 (0.90%)                       | 91 (7.45%)                     |                                          |                             | 81 (8.12%)                         | 2 (1.54%)                        |                                        |                             |
| Unknown                                  | 180 (10.82%)                  | 180 (40.72%)                    | 0 (0%)                         |                                          |                             | 0 (0.00%)                          | 0 (0.00%)                        |                                        |                             |
| <b>Infant Characteristics</b>            |                               |                                 |                                |                                          |                             |                                    |                                  |                                        |                             |
| <b>Age at M-CHAT (months)</b>            | 23<br>(16, 30)                | 24<br>(16, 30)                  | 21<br>(16, 30)                 | <.001                                    | 383443                      | 21.42<br>(16.03, 30.00)            | 23.36<br>(16.13, 28.65)          | 0.04                                   | 57762                       |
| <b>Gestational Age at Birth (weeks)</b>  | 39<br>(23.00, 41.57)          | 39<br>(23.00, 41.29)            | 39.14<br>(23.86, 41.57)        | 0.02                                     | 249410                      | 39.14<br>(24.14, 41.57)            | 39.00<br>(24.71, 41.29)          | 0.35                                   | 68099                       |
| <b>Female Sex</b>                        | 784 (47.12%)                  | 184 (41.62%)                    | 600 (49.10%)                   | 0.01                                     | 6.97                        | 490 (49.15%)                       | 65 (50.00%)                      | 0.93                                   | 0.01                        |

<sup>†</sup>Comparisons performed using Chi Squared Test for categorical variables and Wilcoxon Rank-Sum test (*W*, rank total) for continuous variables. All statistical tests were two-sided.

469

470

**Table 2. COMBO Research (COMBO-RSCH) Cohort Characteristics**

| Variable<br>No. (%) or Median (Min, Max)  | Overall Sample<br>(N=359)      | SARS-CoV-2<br>Unexposed<br>(N=268) | SARS-CoV-2<br>Exposed<br>(N=91) | SARS-CoV-2 Unexposed vs.<br>Exposed |                             |
|-------------------------------------------|--------------------------------|------------------------------------|---------------------------------|-------------------------------------|-----------------------------|
|                                           |                                |                                    |                                 | $p^{\dagger}$                       | Test statistic <sup>†</sup> |
| <b>Maternal Characteristics</b>           |                                |                                    |                                 |                                     |                             |
| Age at Delivery (years)                   | 32 (5)                         | 32 (5)                             | 32 (5)                          | 0.70                                | 12524                       |
| Insurance                                 |                                |                                    |                                 | 0.84                                | 0.35                        |
| Commercial                                | 216 (60.2%)                    | 163 (69.8%)                        | 55 (60.4%)                      |                                     |                             |
| Medicaid                                  | 143 (39.8%)                    | 105 (39.2%)                        | 36 (39.6%)                      |                                     |                             |
| Race                                      |                                |                                    |                                 | 0.21                                | 8.34                        |
| Black or African American                 | 36 (10%)                       | 30 (11.2%)                         | 6 (6.6%)                        |                                     |                             |
| Native American or Alaskan Native         | 3 (0.8%)                       | 2 (0.7%)                           | 2 (2.2%)                        |                                     |                             |
| Native Hawaiian or Other Pacific Islander | 1 (0.3%)                       | 1 (0.4%)                           | 0 (0%)                          |                                     |                             |
| Asian or Asian American                   | 12 (3.3%)                      | 10 (3.7%)                          | 2 (2.2%)                        |                                     |                             |
| White                                     | 153 (42.6%)                    | 120 (44.8%)                        | 32 (35.2%)                      |                                     |                             |
| Other or Mixed Race                       | 96 (26.7%)                     | 63 (23.5%)                         | 33 (36.3%)                      |                                     |                             |
| Declined or Unknown                       | 60 (16.7%)                     | 42 (15.7%)                         | 17 (18.7%)                      |                                     |                             |
| Ethnicity                                 |                                |                                    |                                 | 0.03                                | 9.16                        |
| Hispanic or Latino/a/x or Spanish         | 151 (42.1%)                    | 103 (38.4%)                        | 48 (52.7%)                      |                                     |                             |
| Not Hispanic or Latino/a/x or Spanish     | 157 (43.7%)                    | 126 (47.0%)                        | 31 (34.1%)                      |                                     |                             |
| Declined or Unknown                       | 51 (14.2%)                     | 39 (14.6%)                         | 12 (13.2%)                      |                                     |                             |
| <b>Infant Characteristics</b>             |                                |                                    |                                 |                                     |                             |
| Age at M-CHAT (months)                    | 18.44 (1.07)<br>(16.53, 27)    | 18.23 (1.21)<br>(16.53, 23.9)      | 18.04 (0.89)<br>(16.53, 27)     | <0.001                              | 184167                      |
| Gestational Age at Birth (weeks)          | 38.77 (1.74)<br>(30.57, 41.57) | 39.14 (1.72)<br>(30.57, 41.43)     | 39.00 (1.81)<br>(30.57, 41.57)  | 0.90                                | 12222                       |

|            |             |             |            |      |      |
|------------|-------------|-------------|------------|------|------|
| Female Sex | 160 (44.6%) | 115 (42.9%) | 45 (49.5%) | 0.34 | 0.93 |
|------------|-------------|-------------|------------|------|------|

471

472

**Table 3. Comparison of Rates of Positive M-CHAT Screenings Between the Historical (n=442) and Pandemic (n=1222) Cohorts (COMBO-EHR)**

| Predictor                                                        | B     | SE   | Odds Ratio | 95% CI      | P-value |
|------------------------------------------------------------------|-------|------|------------|-------------|---------|
| Pandemic Birth ( <i>Reference: Born on or after 03/01/2020</i> ) | -0.29 | 0.19 | 0.75       | 0.52 - 1.08 | 0.12    |
| Age at M-CHAT administration (months)                            | -0.04 | 0.02 | 0.96       | 0.93 - 1.00 | 0.05    |
| Gestational age (weeks)                                          | -0.10 | 0.03 | 0.90       | 0.86 - 0.95 | <.001   |
| Maternal age at delivery >35                                     | -0.01 | 0.01 | 0.99       | 0.97 - 1.01 | 0.16    |
| Infant sex assigned at birth (Male)                              | 0.61  | 0.12 | 1.84       | 1.45 - 3.12 | <.001   |
| Insurance (Medicaid)                                             | 0.75  | 0.20 | 2.11       | 1.45 - 3.14 | <.001   |
| Maternal Race—American Indian or Alaska Native                   | -0.30 | 1.12 | 0.74       | 0.04 - 4.72 | 0.78    |
| Maternal Race—Asian                                              | 0.08  | 0.44 | 1.08       | 0.43 - 2.45 | 0.86    |
| Maternal Race—Black or African American                          | 0.34  | 0.20 | 1.41       | 0.95 - 2.09 | 0.10    |
| Maternal Race—Declined                                           | 0.29  | 0.23 | 1.33       | 0.83 - 2.10 | 0.22    |
| Maternal Race—Other Combinations Not Described                   | 0.26  | 0.31 | 1.29       | 0.71 - 2.35 | 0.41    |
| Maternal Race—White                                              | 0.09  | 0.18 | 1.10       | 0.77 - 1.56 | 0.61    |
| Maternal Ethnicity—Not Hispanic or Latino or Spanish Origin      | -0.29 | 0.19 | 0.75       | 0.51 - 1.09 | 0.13    |

486

487

**Table 4. Comparison of Rates of Positive M-CHAT Screenings Between SARS-CoV-2 Exposed and Unexposed Infants Across the COMBO-EHR and COMBO-RSCH Cohorts**

| Predictor                                                          | B     | SE   | Odds Ratio | 95% CI      | P-value |
|--------------------------------------------------------------------|-------|------|------------|-------------|---------|
| <b>COMBO-EHR Cohort</b>                                            |       |      |            |             |         |
| SARS-CoV-2 Infection in pregnancy (n=130 exposed; n=997 unexposed) | -0.91 | .28  | 0.40       | 0.22 - 0.68 | 0.004   |
| Age at M-CHAT administration (months)                              | -0.04 | 0.02 | 0.96       | 0.92 - 1.01 | 0.09    |
| Gestational age (weeks)                                            | -0.13 | 0.04 | 0.88       | 0.82 - 0.93 | <.001   |



|                                                             |       |       |      |               |       |
|-------------------------------------------------------------|-------|-------|------|---------------|-------|
| Maternal age at delivery                                    | -0.01 | 0.01  | 0.99 | 0.96 - 1.01   | 0.34  |
| Infant sex assigned at birth (Male)                         | 0.54  | 0.15  | 1.71 | 1.28 - 2.30   | <.001 |
| Insurance (Medicaid)                                        | 0.56  | 0.25  | 1.75 | 1.09 - 2.87   | 0.02  |
| Maternal Race–American Indian or Alaska Native              | 0.37  | 1.27  | 1.45 | 0.064 - 14.64 | 0.77  |
| Maternal Race–Asian                                         | -0.13 | 0.59  | 0.88 | 0.24 - 2.58   | 0.83  |
| Maternal Race–Black or African American                     | 0.26  | 0.24  | 1.29 | 0.80 - 2.08   | 0.29  |
| Maternal Race–Declined                                      | 0.46  | 0.26  | 1.58 | 0.95 - 2.60   | 0.07  |
| Maternal Race–White                                         | -0.05 | -0.06 | 0.95 | 0.61 - 1.45   | 0.80  |
| Maternal Ethnicity–Declined                                 | -0.55 | 0.36  | 0.58 | 0.28 - 1.14   | 0.12  |
| Maternal Ethnicity–Not Hispanic or Latino or Spanish Origin | -0.39 | 0.24  | 0.68 | 0.42 - 1.08   | 0.11  |

---

**COMBO-RSCH Cohort**

---

|                                                                   |       |      |      |             |       |
|-------------------------------------------------------------------|-------|------|------|-------------|-------|
| SARS-CoV-2 Infection in pregnancy (n=91 exposed; n=268 unexposed) | -0.42 | 0.37 | 0.67 | 0.31 - 1.37 | 0.25  |
| Age at M-CHAT administration (months)                             | -0.30 | 0.13 | 0.75 | 0.56-0.98   | 0.03  |
| Gestational age (weeks)                                           | -0.26 | 0.09 | 0.75 | 0.56 - 0.98 | 0.005 |
| Maternal age at delivery                                          | -0.10 | 0.03 | 0.91 | 0.85-0.98   | 0.004 |
| Infant sex assigned at birth (Male)                               | 0.78  | 0.34 | 2.18 | 1.15-4.30   | 0.02  |
| Insurance (Medicaid)                                              | 0.30  | 0.40 | 1.35 | 6.18-2.98   | 0.45  |
| Maternal Race–American Indian or Alaska Native                    | 0.93  | 1.40 | 2.53 | 0.10-35.94  | 0.51  |
| Maternal Race–Asian                                               | 1.11  | 0.82 | 3.03 | 0.54- 14.18 | 0.18  |
| Maternal Race–Black or African American                           | 0.12  | 0.56 | 1.13 | 0.36-3.32   | 0.83  |
| Maternal Race–Declined                                            | -0.81 | 0.63 | 0.45 | 0.12-1.43   | 0.19  |
| Maternal Race–White                                               | -0.12 | 0.44 | 0.89 | 0.37-2.09   | 0.79  |
| Maternal Ethnicity–Declined                                       | 0.18  | 0.59 | 1.20 | 0.36-3.81   | 0.76  |
| Maternal Ethnicity–Not Hispanic or Latino or Spanish Origin       | -0.56 | 0.46 | 0.57 | 0.23-1.39   | 0.22  |

---



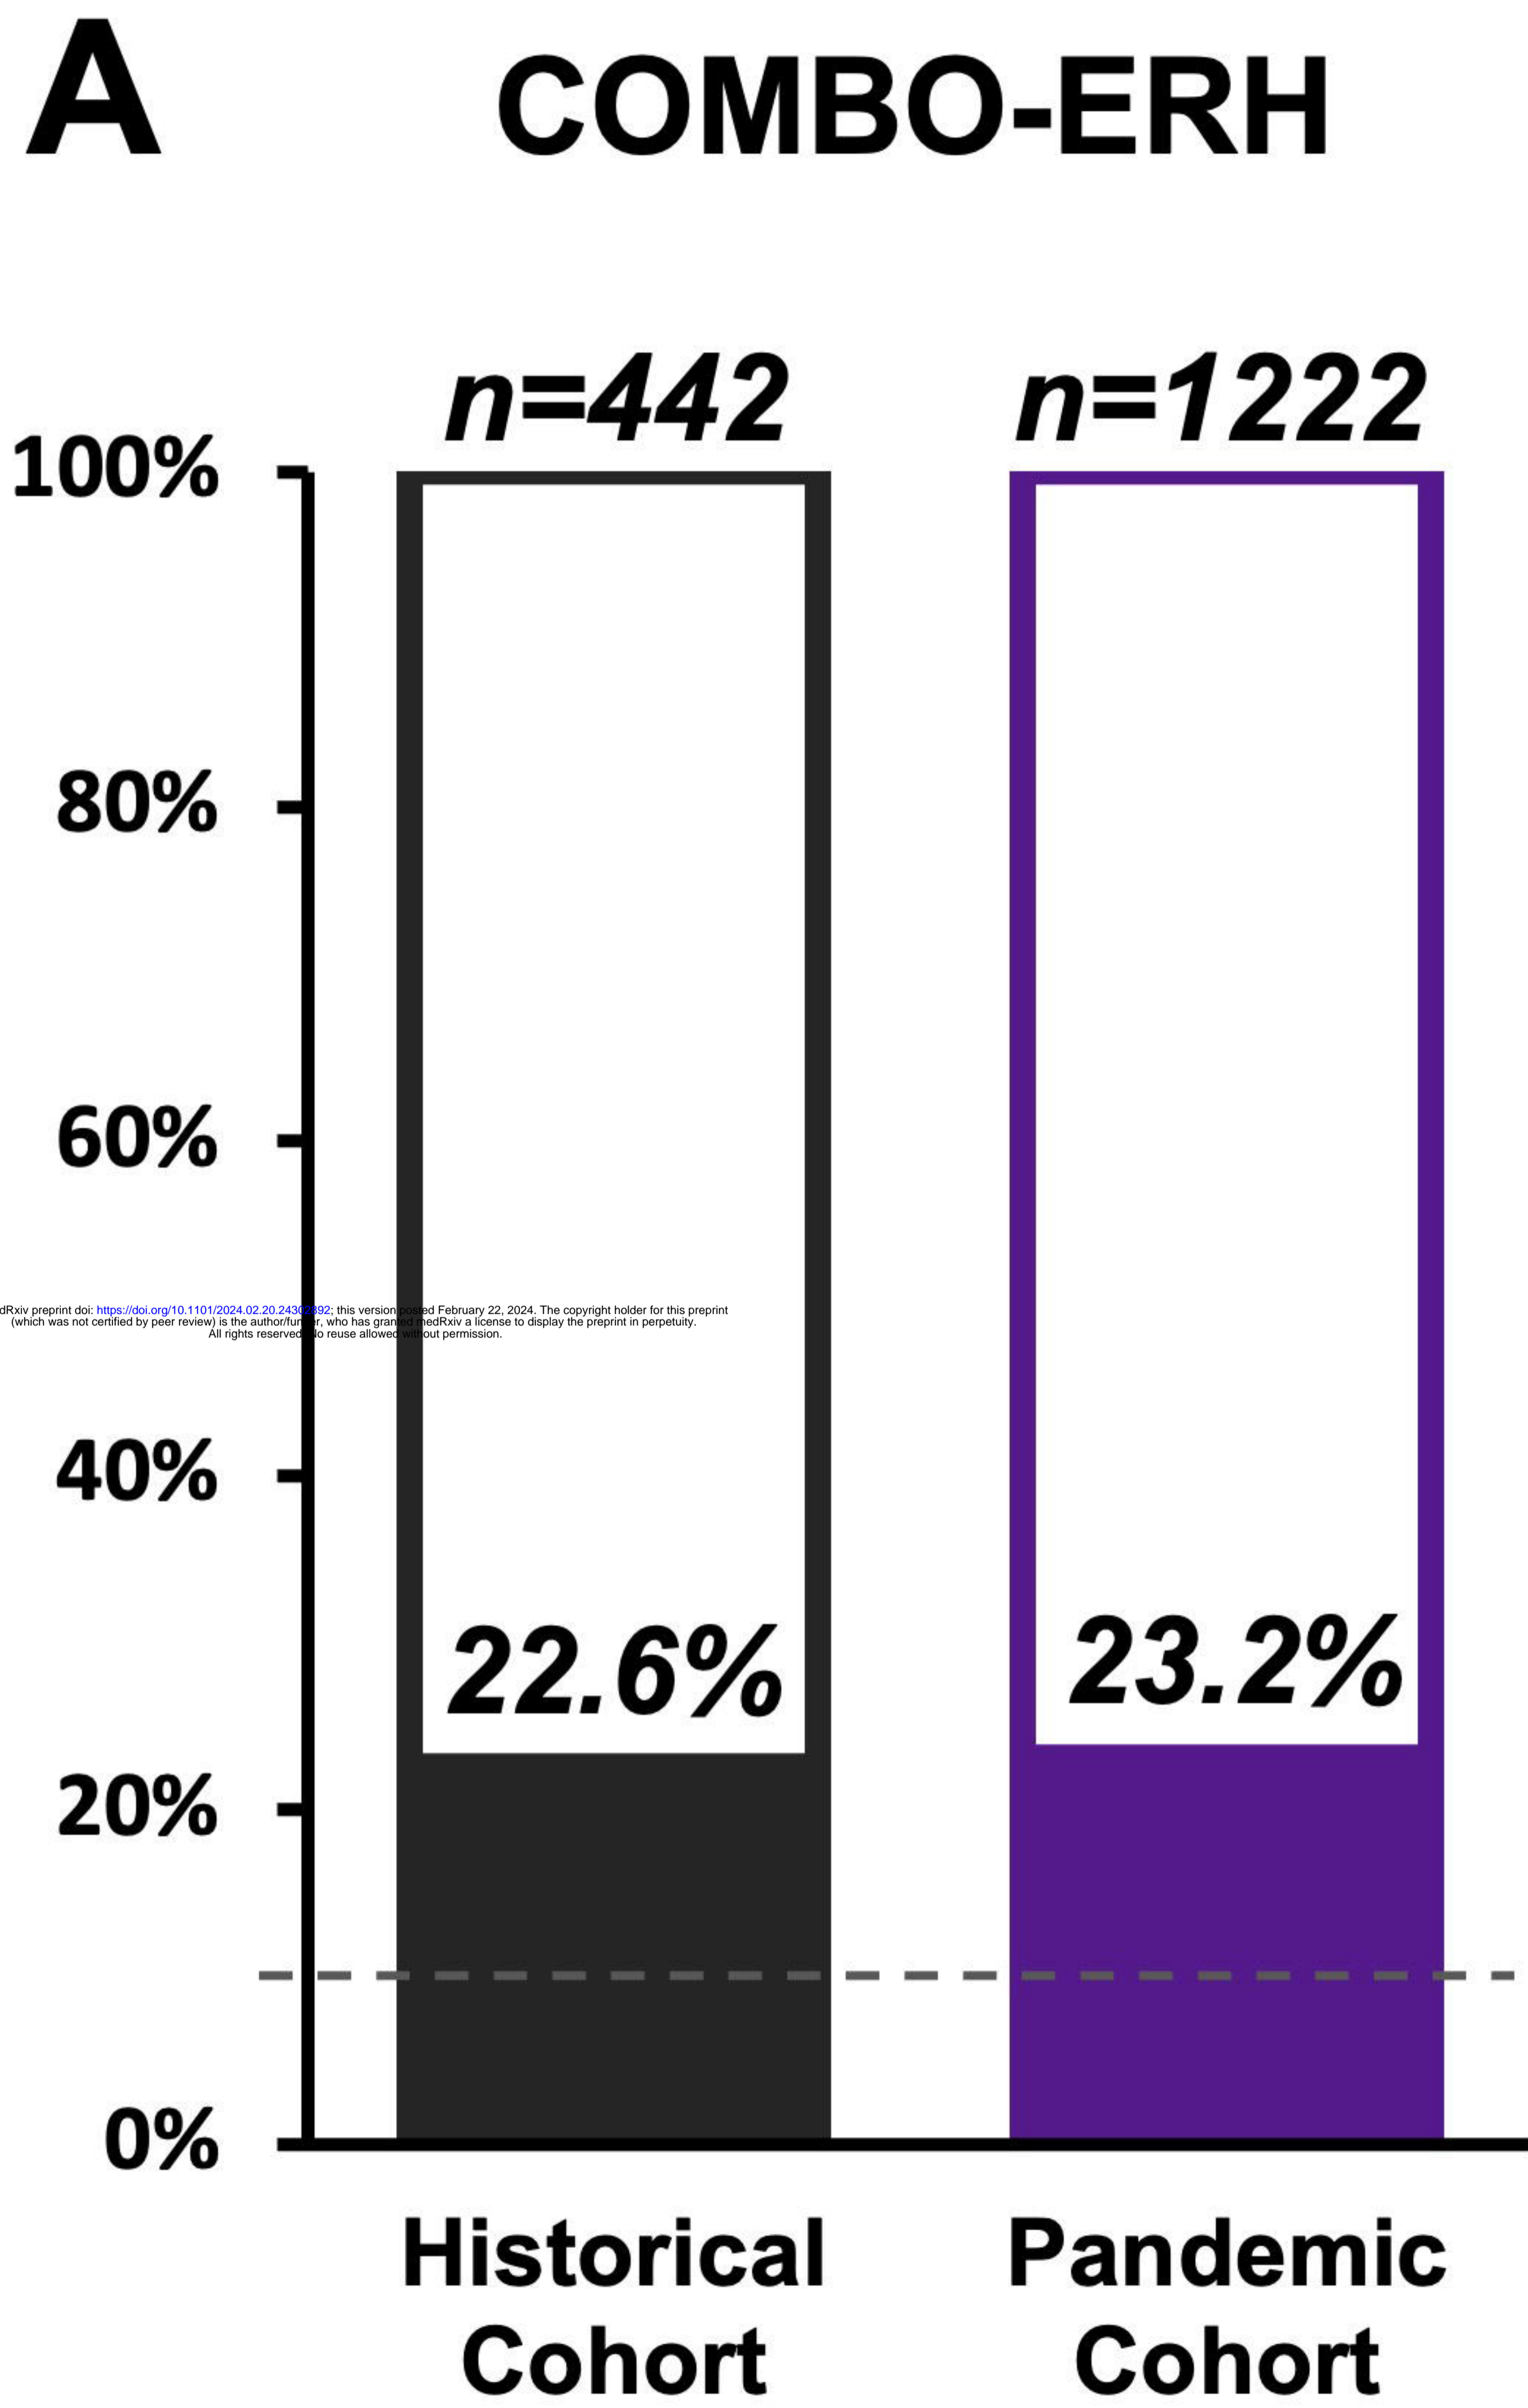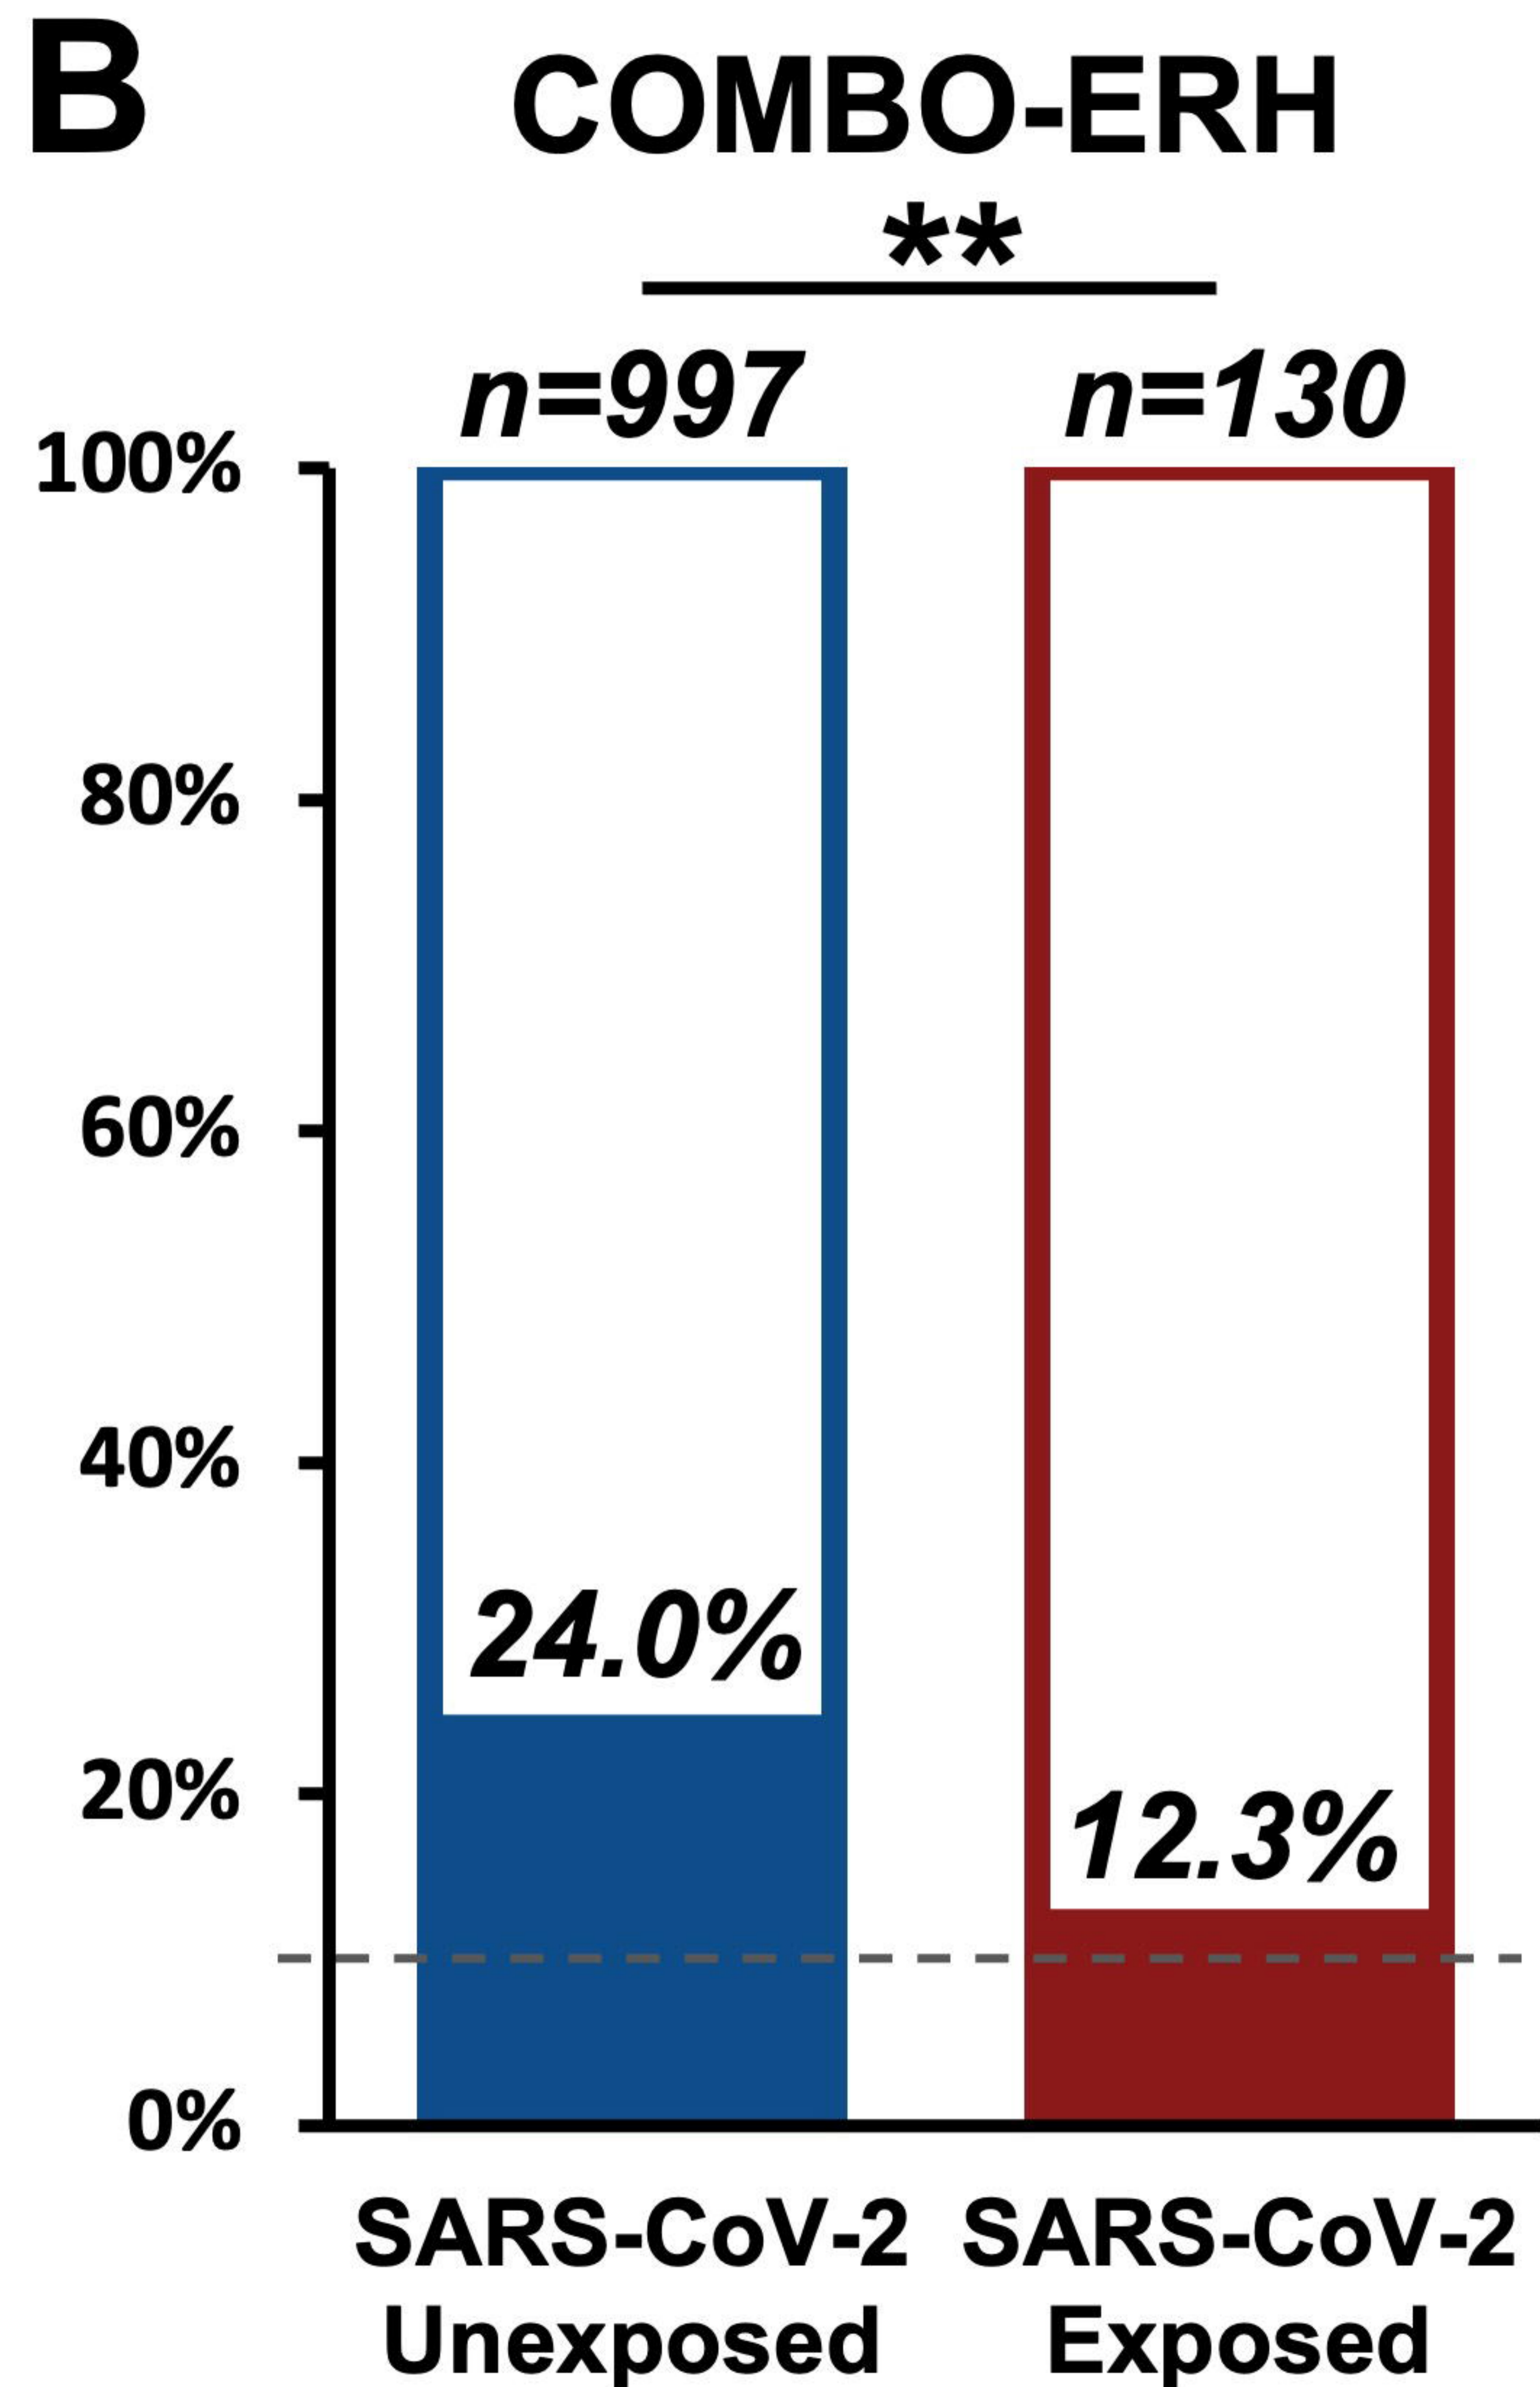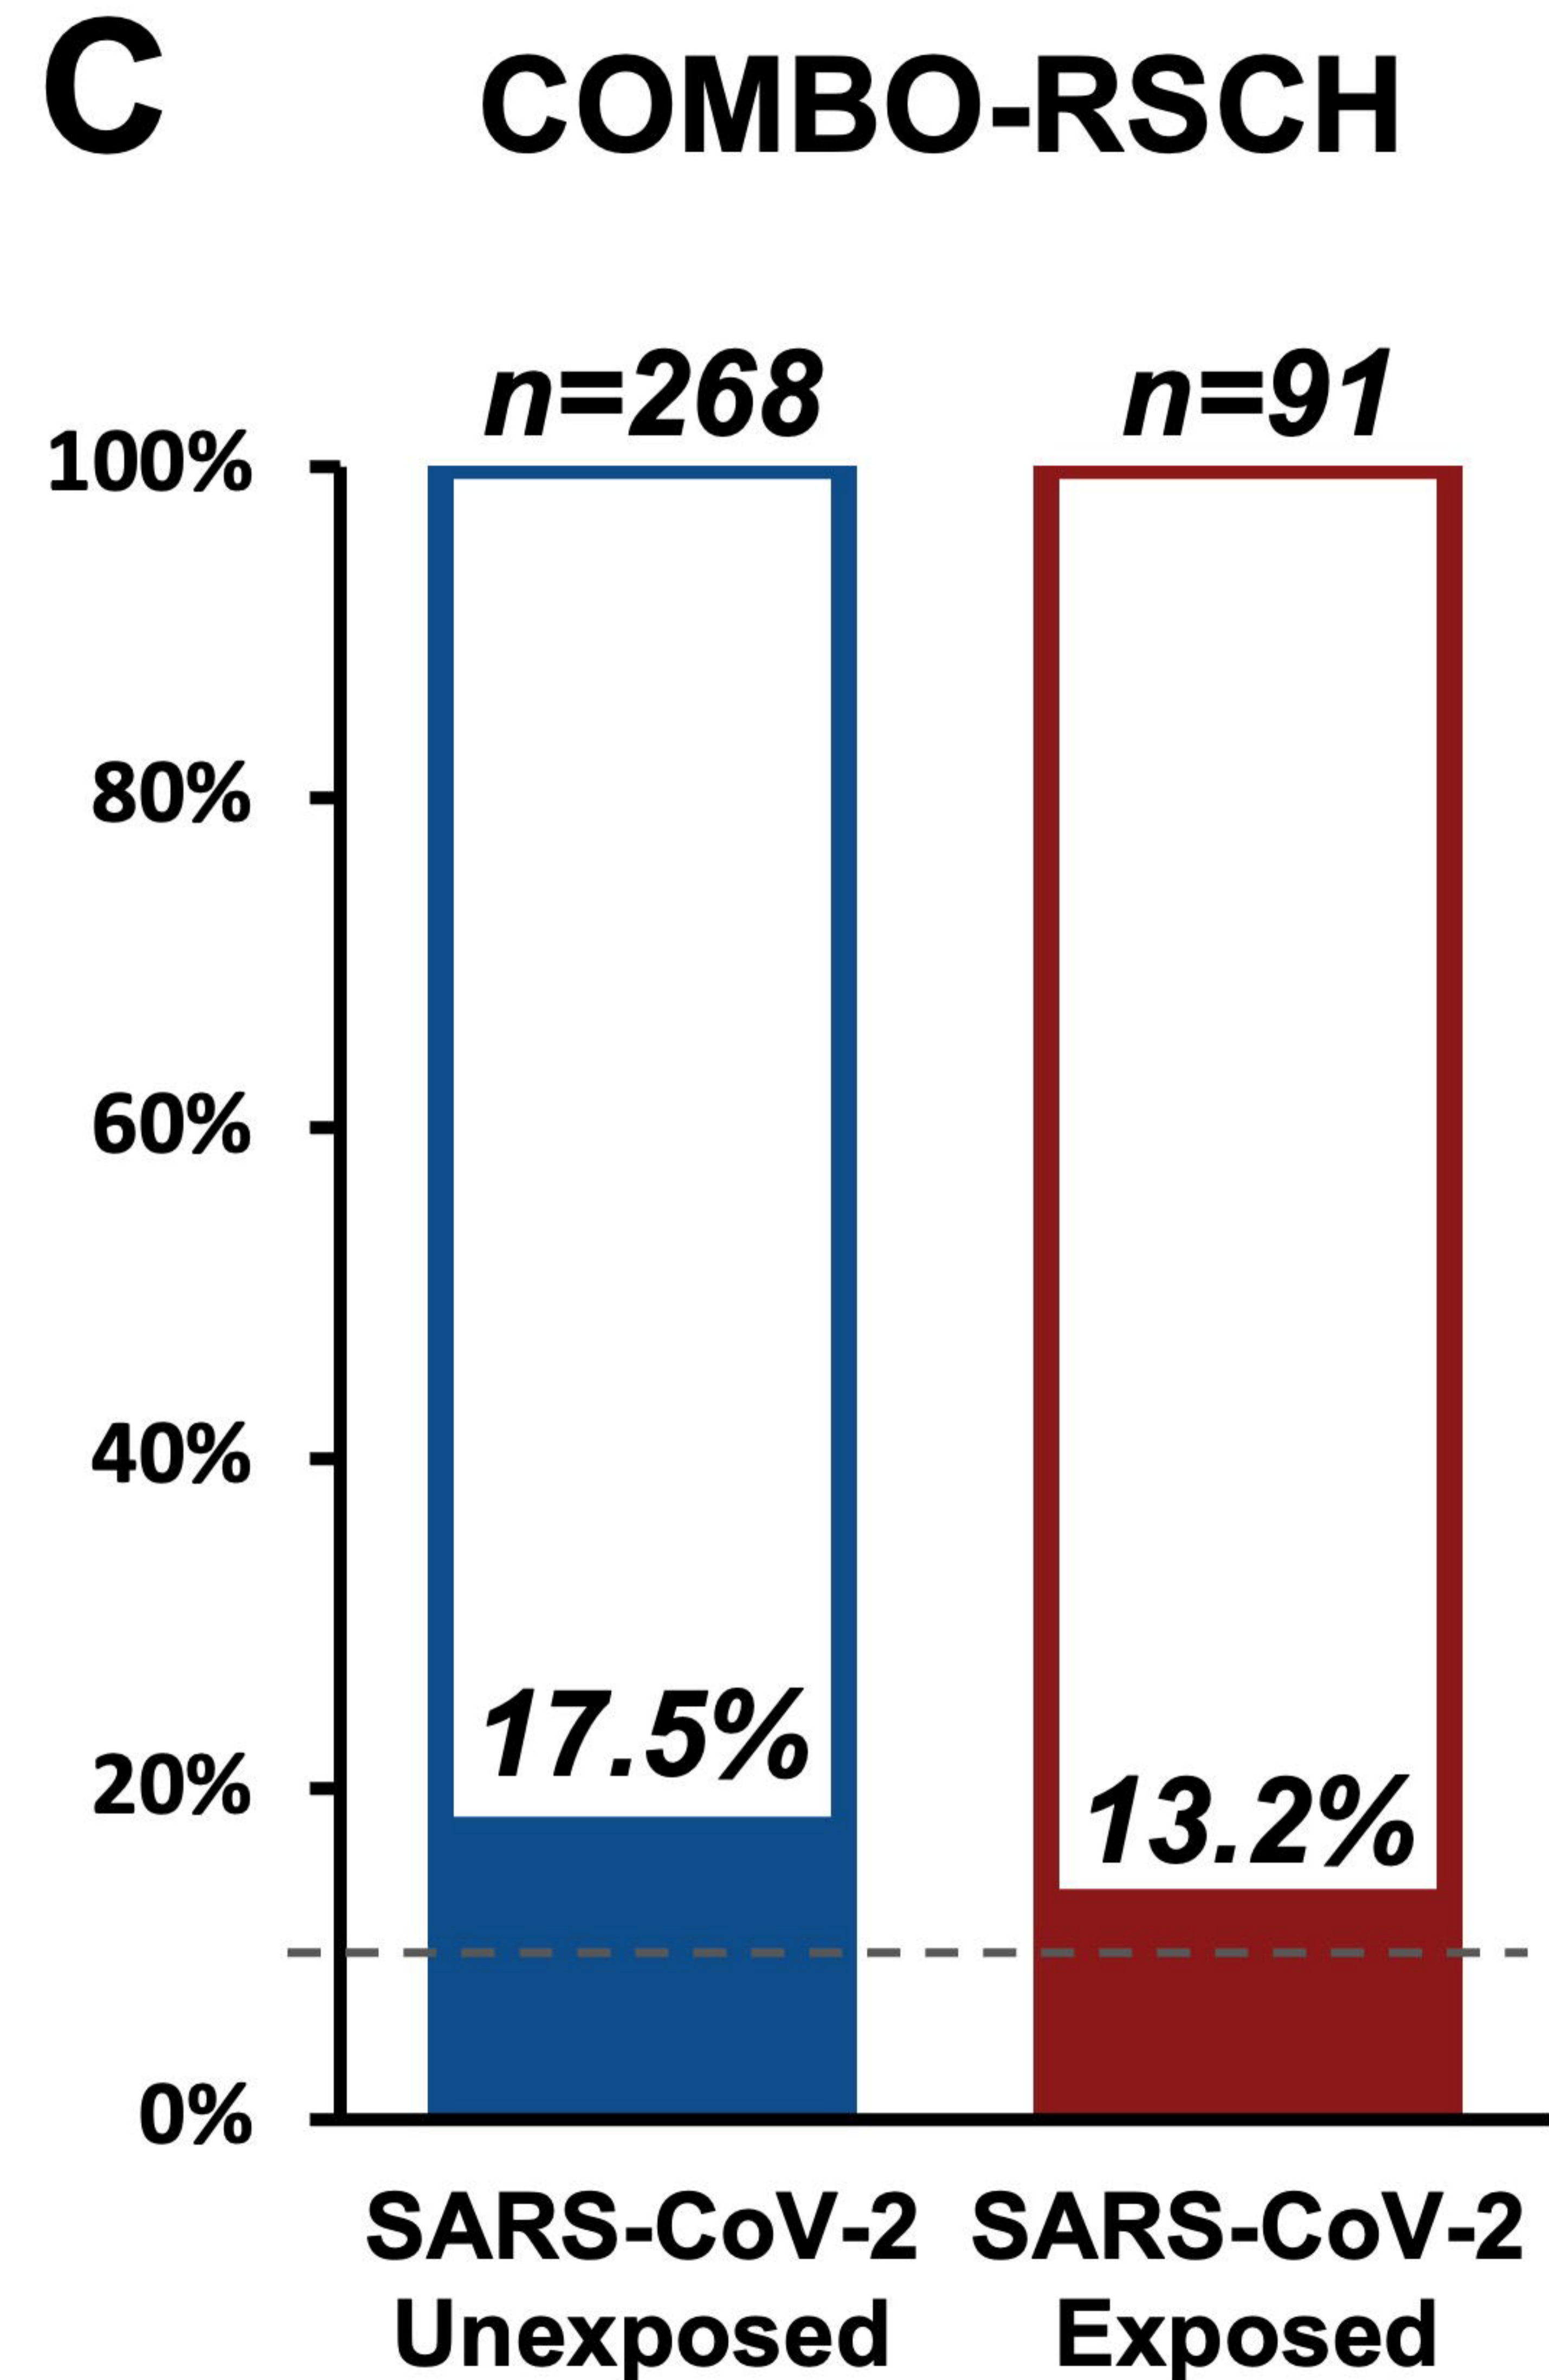

medRxiv preprint doi: <https://doi.org/10.1101/2024.02.24.24090992>; this version posted February 22, 2024. The copyright holder for this preprint (which was not certified by peer review) is the author/funder, who has granted medRxiv a license to display the preprint in perpetuity. All rights reserved. No reuse allowed without permission.
